# Supplementary material for: Deformation recorded in polyhalite from evaporite detachments revealed by 40 Ar ∕ 39 Ar dating
Source: Copernicus journal article supplement (doi:10.5194/gchron-3-545-2021), 2021-12-13
Supplement: Supplementary file 1 [file Ar-Ar polyhalite Suplementary Datasheet.xlsx]

## Sheet: SRLR05-P2
	Relative Abundances			36Ar [V]	%1s	37Ar [V]	%1s	38Ar [V]	%1s	39Ar [V]	%1s	40Ar [V]	%1s	40(r)/39(k)	± 2s	Age	± 2s	40Ar(r)	39Ar(k)	K/Ca	± 2s
																(Ma)		(%)	(%)
	5M37496D	58.8		7.46854e-06	129.206	0.00193014	18.77	4.38798e-05	24.709	0.00352844	0.618604	0.0461887	0.301249	12.507	1.64302	230.367	28.4143	95.5037	0.18322	0.785747	0.29513
	5M37498D	59.3		0.000142524	7.68541	0.0185331	3.34029	0.00029897	4.03469	0.0214163	0.45628	0.389755	0.0916012	16.2918	0.34158	294.665	5.7009	89.4619	1.11181	0.49657	0.0334822
	5M37499D	59.8		0.000146623	8.7332	0.0655104	3.07808	0.00137333	1.64984	0.113054	0.180402	1.95411	0.10568	16.951	0.0983221	305.632	1.63105	98.0258	5.87038	0.741743	0.0457414
	5M37500D	60.5		0.000202944	6.03851	0.244991	2.5633	0.00555402	0.61526	0.470172	0.164129	7.62425	0.0416683	16.1347	0.0569011	292.039	0.951048	99.4598	24.415	0.824904	0.0423762
	5M37501D	61		3.15043e-05	30.1973	0.0446612	3.21982	0.00101981	2.42844	0.086769	0.146941	1.32284	0.0590452	15.1838	0.0813289	276.076	1.37139	99.5563	4.50574	0.835088	0.0538328
	5M37503D	62		6.29835e-05	17.7579	0.121167	2.59498	0.00277126	0.905386	0.233475	0.108576	3.81506	0.0379162	16.3073	0.0472526	294.923	0.788523	99.7587	12.1239	0.828232	0.0430225
	5M37504D	64		9.69309e-05	9.91015	0.203733	2.54782	0.0046155	0.784457	0.392387	0.0858744	7.06972	0.0395107	17.9917	0.037114	322.814	0.609857	99.8189	20.3758	0.827846	0.042208
	5M37505D	67		9.45492e-05	13.2807	0.227201	2.56325	0.0053051	0.677129	0.44149	0.0872236	9.27072	0.020758	20.9837	0.0413628	371.323	0.661681	99.8896	22.9257	0.835235	0.0428431
	5M37506D	70		2.01922e-05	43.7064	0.0842896	2.80597	0.00197977	1.07699	0.163467	0.0993034	3.52296	0.0524602	21.5639	0.058254	380.581	0.927129	100.018	8.48851	0.833593	0.0468101
			S	0.000805719	4.06112	1.01202	1.09332	0.0229616	0.344106	1.92576	0.0523368	35.0156	0.0161876
	Information on Analysis and Constants Used in Calculations									Results		40(a)/36(a)	± 2s	40(r)/39(k)	± 2s	Age	± 2s	MSWD	39Ar(k)	K/Ca	± 2s
																(Ma)			(%,n)
	Sample = SRLR05-P				Age Equations = Min et al. (2000)					Age Plateau Cannot Calculate
	Material = poly				Negative Intensities = Allowed
	Location = Laser				Decay Constant 40K = 5.531 ± 0.013 E-10 1/a
	Analyst = Fred Jourdan				Decay Constant 39Ar = 2.940 ± 0.029 E-07 1/h
	Project = POLYHALITE PAKISTAN_L RICHARDS15				Decay Constant 37Ar = 8.230 ± 0.082 E-04 1/h
	Mass Discrimination Law = POW				Decay Constant 36Cl = 2.303 ± 0.046 E-06 1/a					Total Fusion Age				18.1067	0.0223198	324.703	1.46904		9	0.817917	0.0179054
	Irradiation = I19t40h				Decay Constant 40K(EC,β⁺) = 0.576 ± 0.002 E-10 1/a										0.00123268		0.00452425
	J = 0.01086400 ± 0.00002600				Decay Constant 40K(β⁻) = 4.955 ± 0.013 E-10 1/a					Full External Error							2.69256
	GA1550 = 99.738 ± 0.100 Ma				Atmospheric Ratio 40/36(a) = 298.56 ± 0.30					Analytical Error							0.366375
	IGSN = Undefined				Atmospheric Ratio 38/36(a) = 0.1869 ± 0.0002
	Preferred Age = Undefined				Production Ratio 39/37(ca) = 0.000760 ± 0.000009					Normal Isochron Cannot Calculate
	Classification = Undefined				Production Ratio 38/37(ca) = 0.000023 ± 0.000002
	Experiment Type = Undefined				Production Ratio 36/37(ca) = 0.000270 ± 0.000002
	Extraction Method = Undefined				Production Ratio 40/39(k) = 0.000730 ± 0.000091
	Heating = 60 sec				Production Ratio 38/39(k) = 0.012400 ± 0.003968
	Isolation = 3.00 min				Production Ratio 36/38(cl) = 263.00 ± 13.15
	Instrument = MAP215-50				Scaling Ratio K/Ca = 0.430
	Lithology = Undefined				Abundance Ratio 40K/K = 1.1700 ± 0.0100 E-04					Inverse Isochron Cannot Calculate
	Lat-Lon = Undefined - Undefined				Atomic Weight K = 39.0983 ± 0.0001 g
	Feature = Undefined

## Sheet: SRLR05-W2
	Relative Abundances			36Ar [V]	%1s	37Ar [V]	%1s	38Ar [V]	%1s	39Ar [V]	%1s	40Ar [V]	%1s	40(r)/39(k)	± 2s	Age	± 2s	40Ar(r)	39Ar(k)	K/Ca	± 2s
																(Ma)		(%)	(%)
	5M37511D	59.8		3.41464e-05	25.0822	0.0310998	3.58291	0.000738453	3.62142	0.0594888	0.165075	0.971848	0.0911368	16.2131	0.105646	293.35	1.76449	99.2045	9.04528	0.822193	0.0589794
	5M37512D	60.5		4.87449e-05	17.6998	0.0788131	2.87657	0.0017876	1.37542	0.150127	0.152706	2.3782	0.0240389	15.7922	0.0597599	286.306	1.002	99.6506	22.8268	0.818757	0.0471706
	5M37513D	61		2.28147e-06	274.894	0.0139652	4.54106	0.000339414	2.5676	0.0270272	0.193784	0.472108	0.113832	17.4905	0.159409	314.56	2.63139	100.09	4.10951	0.83186	0.0756194
	5M37515D	62		2.34526e-05	26.8675	0.0192919	4.31517	0.000425077	2.32274	0.0361021	0.179038	0.641307	0.0797884	17.6193	0.125192	316.684	2.06414	99.1466	5.48928	0.804357	0.0694785
	5M37516D	64		3.73056e-05	19.7442	0.0655187	2.8241	0.00144481	1.51284	0.124108	0.131907	2.54106	0.0347074	20.4349	0.0661375	362.521	1.06316	99.766	18.8705	0.814194	0.0460374
	5M37517D	67		3.98725e-05	19.1513	0.0519955	3.29142	0.00121762	1.2759	0.102051	0.165866	2.43244	0.0247602	23.7684	0.0914721	415.329	1.4281	99.6799	15.5171	0.843634	0.0556056
	5M37518D	70		5.31725e-05	13.4949	0.0810807	2.69725	0.00188016	1.36615	0.158772	0.118595	3.61076	0.0482684	22.6911	0.0641543	398.431	1.011	99.7381	24.1415	0.841698	0.0454494
			S	0.000238976	8.2731	0.341765	1.26231	0.00783313	0.684158	0.657676	0.0608257	13.0477	0.0185214
	Information on Analysis and Constants Used in Calculations									Results		40(a)/36(a)	± 2s	40(r)/39(k)	± 2s	Age	± 2s	MSWD	39Ar(k)	K/Ca	± 2s
																(Ma)			(%,n)
	Sample = SRLR05-W				Age Equations = Min et al. (2000)					Age Plateau Cannot Calculate
	Material = poly				Negative Intensities = Allowed
	Location = Laser				Decay Constant 40K = 5.531 ± 0.013 E-10 1/a
	Analyst = Fred Jourdan				Decay Constant 39Ar = 2.940 ± 0.029 E-07 1/h
	Project = POLYHALITE PAKISTAN_L RICHARDS15				Decay Constant 37Ar = 8.230 ± 0.082 E-04 1/h
	Mass Discrimination Law = POW				Decay Constant 36Cl = 2.303 ± 0.046 E-06 1/a					Total Fusion Age				19.7796	0.0309388	351.957	1.61048		7	0.827145	0.0209066
	Irradiation = I19t40h				Decay Constant 40K(EC,β⁺) = 0.576 ± 0.002 E-10 1/a										0.00156417		0.00457577
	J = 0.01086400 ± 0.00002600				Decay Constant 40K(β⁻) = 4.955 ± 0.013 E-10 1/a					Full External Error							2.92096
	GA1550 = 99.738 ± 0.100 Ma				Atmospheric Ratio 40/36(a) = 298.56 ± 0.30					Analytical Error							0.500257
	IGSN = Undefined				Atmospheric Ratio 38/36(a) = 0.1869 ± 0.0002
	Preferred Age = Undefined				Production Ratio 39/37(ca) = 0.000760 ± 0.000009					Normal Isochron Cannot Calculate
	Classification = Undefined				Production Ratio 38/37(ca) = 0.000023 ± 0.000002
	Experiment Type = Undefined				Production Ratio 36/37(ca) = 0.000270 ± 0.000002
	Extraction Method = Undefined				Production Ratio 40/39(k) = 0.000730 ± 0.000091
	Heating = 60 sec				Production Ratio 38/39(k) = 0.012400 ± 0.003968
	Isolation = 3.00 min				Production Ratio 36/38(cl) = 263.00 ± 13.15
	Instrument = MAP215-50				Scaling Ratio K/Ca = 0.430
	Lithology = Undefined				Abundance Ratio 40K/K = 1.1700 ± 0.0100 E-04					Inverse Isochron Cannot Calculate
	Lat-Lon = Undefined - Undefined				Atomic Weight K = 39.0983 ± 0.0001 g
	Feature = Undefined

## Sheet: SRLR06-1.2
	Relative Abundances			36Ar [V]	%1s	37Ar [V]	%1s	38Ar [V]	%1s	39Ar [V]	%1s	40Ar [V]	%1s	40(r)/39(k)	± 2s	Age	± 2s	40Ar(r)	39Ar(k)	K/Ca	± 2s
																(Ma)		(%)	(%)
	5M37536D	59.3		0.00017366	10.2979	0.115954	2.76429	0.000140796	9.36035	0.000747843	1.61449	0.0627944	0.47373	30.7721	16.2732	521.496	239.576	32.3292	14.2792	0.00244649	0.000163405
	5M37537D	59.8	4	0.000354611	5.22241	0.243233	2.57592	0.000281733	3.77349	0.0010535	1.55187	0.0987217	0.270681	14.3577	12.8167	262.092	217.797	12.6332	18.8012	0.00153563	9.97261e-05
	5M37538D	60.5	4	0.000453037	3.93206	0.226888	2.58601	0.000296493	3.93386	0.0011275	1.13429	0.129935	0.249962	13.5912	11.215	249.021	191.961	9.99008	20.6718	0.00181006	0.000107057
	5M37539D	61	4	7.76565e-05	25.4187	0.0255172	3.85141	2.43941e-05	45.8291	0.000175319	7.13313	0.0231158	1.08556	12.7507	75.6955	234.576	1306.03	8.60089	3.37491	0.00262756	0.000468297
	5M37541D	62	4	0.000312704	6.49146	0.0994429	2.71066	0.000146001	8.94264	0.000502553	2.86391	0.0933991	0.33166	18.8782	28.4765	337.323	464.186	8.63021	9.24163	0.00184628	0.000160894
	5M37542D	64	4	0.00102841	1.91322	0.20818	2.62545	0.000341292	5.53457	0.000945399	1.54743	0.29115	0.158088	1.14176	15.0342	22.2905	291.709	0.308698	17.0381	0.00162594	0.000106289
	5M37543D	67	4	0.00101666	2.90486	0.117975	2.78415	0.00029163	3.81953	0.000723802	4.35232	0.298769	0.323594	7.49073	28.0139	141.465	508.887	1.58992	13.7256	0.00231135	0.000263993
	5M37544D	70	4	0.000100952	20.1391	0.00668523	12.773	3.2814e-05	43.1262	0.00013757	18.5872	0.0241508	1.42506	-41.133	93.148	-1070.72	3308.04	-22.5652	2.86764	0.00852182	0.00394545
			S	0.0035177	1.67082	1.04387	1.10719	0.00155515	2.4054	0.00541349	0.977539	1.02203	0.127171
	Information on Analysis and Constants Used in Calculations									Results		40(a)/36(a)	± 2s	40(r)/39(k)	± 2s	Age	± 2s	MSWD	39Ar(k)	K/Ca	± 2s
																(Ma)			(%,n)
	Sample = SRLR06-1				Age Equations = Min et al. (2000)					Age Plateau				10.8573	6.85838	201.61	120.513	0.638375	85.7208	0.0017168	0.000185669
	Material = poly				Negative Intensities = Allowed										0.631681		0.597755	0.699635	7
	Location = Laser				Decay Constant 40K = 5.531 ± 0.013 E-10 1/a					Full External Error							120.522	2.1547	2σ Confidence Limit
	Analyst = Fred Jourdan				Decay Constant 39Ar = 2.940 ± 0.029 E-07 1/h					Analytical Error							120.51	1	Error Magnification
	Project = POLYHALITE PAKISTAN_L RICHARDS15				Decay Constant 37Ar = 8.230 ± 0.082 E-04 1/h
	Mass Discrimination Law = POW				Decay Constant 36Cl = 2.303 ± 0.046 E-06 1/a					Total Fusion Age				12.1211	7.63621	223.68	132.553		8	0.00190316	6.11554e-05
	Irradiation = I19t40h				Decay Constant 40K(EC,β⁺) = 0.576 ± 0.002 E-10 1/a										0.629994		0.592602
	J = 0.01086400 ± 0.00002600				Decay Constant 40K(β⁻) = 4.955 ± 0.013 E-10 1/a					Full External Error							132.563
	GA1550 = 99.738 ± 0.100 Ma				Atmospheric Ratio 40/36(a) = 298.56 ± 0.30					Analytical Error							132.55
	IGSN = Undefined				Atmospheric Ratio 38/36(a) = 0.1869 ± 0.0002
	Preferred Age = Undefined				Production Ratio 39/37(ca) = 0.000760 ± 0.000009					Normal Isochron		287.523	16.0294	17.5489	12.3155	315.524	203.191	0.59909	85.7208
	Classification = Undefined				Production Ratio 38/37(ca) = 0.000023 ± 0.000002								0.0557499		0.701783		0.643979	0.700687	7
	Experiment Type = Undefined				Production Ratio 36/37(ca) = 0.000270 ± 0.000002					Full External Error							203.203	2.26491	2σ Confidence Limit
	Extraction Method = Undefined				Production Ratio 40/39(k) = 0.000730 ± 0.000091					Analytical Error							203.186	1	Error Magnification
	Heating = 60 sec				Production Ratio 38/39(k) = 0.012400 ± 0.003968												7		Number of Iterations
	Isolation = 3.00 min				Production Ratio 36/38(cl) = 263.00 ± 13.15												7.05899e-05		Convergence
	Instrument = MAP215-50				Scaling Ratio K/Ca = 0.430
	Lithology = Undefined				Abundance Ratio 40K/K = 1.1700 ± 0.0100 E-04					Inverse Isochron		287.577	16.0066	17.9446	10.8418	322.041	178.233	0.423459	85.7208
	Lat-Lon = Undefined - Undefined				Atomic Weight K = 39.0983 ± 0.0001 g								0.0556602		0.604179		0.55345	0.832689	7
	Feature = Undefined									Full External Error							178.247	2.26491	2σ Confidence Limit
										Analytical Error							178.228	1	Error Magnification
																	4		Number of Iterations
																	1.02673e-06		Convergence
																	0.121423		Spreading Factor

## Sheet: SRLR06-2.1
	Relative Abundances			36Ar [V]	%1s	37Ar [V]	%1s	38Ar [V]	%1s	39Ar [V]	%1s	40Ar [V]	%1s	40(r)/39(k)	± 2s	Age	± 2s	40Ar(r)	39Ar(k)	K/Ca	± 2s
																(Ma)		(%)	(%)
	5M37522D	58.8		-8.74506e-06	82.6365	0.00149274	63.0568	3.71891e-05	20.707	0.00308229	0.956724	0.0526451	0.269757	17.9719	1.44594	322.489	23.7639	105.184	0.167043	0.887559	1.11946
	5M37524D	59.3		-5.80105e-06	129.135	0.00243964	38.1812	7.61754e-05	10.1821	0.00539397	0.752331	0.060657	0.243264	11.6063	0.849991	214.722	14.8274	103.174	0.292331	0.950391	0.725883
	5M37525D	59.8		1.92067e-05	43.1378	0.0444892	3.5336	0.00101634	1.639	0.0870838	0.188818	0.872691	0.0703436	9.99976	0.0697499	186.478	1.23589	99.7466	4.71937	0.841361	0.0595455
	5M37526D	60.5		6.9211e-05	12.6827	0.175817	2.58795	0.00400552	0.40025	0.337101	0.0940924	3.91311	0.0340748	11.5927	0.0280378	214.486	0.489161	99.8278	18.2685	0.824128	0.0426842
	5M37527D	61		8.18025e-05	11.738	0.182985	2.61631	0.00417475	0.565504	0.352398	0.0774437	4.87572	0.0370669	13.8131	0.0288727	252.815	0.493162	99.7963	19.0975	0.827778	0.0433334
	5M37529D	62		0.000169335	6.60342	0.263492	2.60276	0.00592229	0.762897	0.503837	0.0650641	8.91813	0.160968	17.6485	0.062919	317.167	1.03712	99.6672	27.3044	0.821899	0.0427975
	5M37530D	64		0.000185813	8.29941	0.287317	2.63262	0.0066127	0.377337	0.550963	0.0932416	10.8022	0.0632899	19.5544	0.047247	348.312	0.76549	99.6971	29.8584	0.824249	0.0434259
	5M37531D	67		2.7603e-06	285.585	0.0034964	27.5694	6.15193e-05	16.2153	0.00539698	0.698585	0.0915719	0.208701	16.8743	0.907165	304.36	15.0594	99.4035	0.292451	0.663414	0.365916
			S	0.000513583	5.40732	0.961529	1.28652	0.0219065	0.287795	1.84526	0.0411811	29.5867	0.0543224
	Information on Analysis and Constants Used in Calculations									Results		40(a)/36(a)	± 2s	40(r)/39(k)	± 2s	Age	± 2s	MSWD	39Ar(k)	K/Ca	± 2s
																(Ma)			(%,n)
	Sample = SRLR06				Age Equations = Min et al. (2000)					Age Plateau Cannot Calculate
	Material = poly				Negative Intensities = Allowed
	Location = Laser				Decay Constant 40K = 5.531 ± 0.013 E-10 1/a
	Analyst = Fred Jourdan				Decay Constant 39Ar = 2.940 ± 0.029 E-07 1/h
	Project = POLYHALITE PAKISTAN_L RICHARDS15				Decay Constant 37Ar = 8.230 ± 0.082 E-04 1/h
	Mass Discrimination Law = POW				Decay Constant 36Cl = 2.303 ± 0.046 E-06 1/a					Total Fusion Age				15.9985	0.0236556	289.761	1.34126		8	0.82488	0.0212354
	Irradiation = I19t40h				Decay Constant 40K(EC,β⁺) = 0.576 ± 0.002 E-10 1/a										0.00147862		0.00462884
	J = 0.01086400 ± 0.00002600				Decay Constant 40K(β⁻) = 4.955 ± 0.013 E-10 1/a					Full External Error							2.42754
	GA1550 = 99.738 ± 0.100 Ma				Atmospheric Ratio 40/36(a) = 298.56 ± 0.30					Analytical Error							0.395879
	IGSN = Undefined				Atmospheric Ratio 38/36(a) = 0.1869 ± 0.0002
	Preferred Age = Undefined				Production Ratio 39/37(ca) = 0.000760 ± 0.000009					Normal Isochron Cannot Calculate
	Classification = Undefined				Production Ratio 38/37(ca) = 0.000023 ± 0.000002
	Experiment Type = Undefined				Production Ratio 36/37(ca) = 0.000270 ± 0.000002
	Extraction Method = Undefined				Production Ratio 40/39(k) = 0.000730 ± 0.000091
	Heating = 60 sec				Production Ratio 38/39(k) = 0.012400 ± 0.003968
	Isolation = 3.00 min				Production Ratio 36/38(cl) = 263.00 ± 13.15
	Instrument = MAP215-50				Scaling Ratio K/Ca = 0.430
	Lithology = Undefined				Abundance Ratio 40K/K = 1.1700 ± 0.0100 E-04					Inverse Isochron Cannot Calculate
	Lat-Lon = Undefined - Undefined				Atomic Weight K = 39.0983 ± 0.0001 g
	Feature = Undefined

## Sheet: SRLR06-2.2
	Relative Abundances			36Ar [V]	%1s	37Ar [V]	%1s	38Ar [V]	%1s	39Ar [V]	%1s	40Ar [V]	%1s	40(r)/39(k)	± 2s	Age	± 2s	40Ar(r)	39Ar(k)	K/Ca	± 2s
																(Ma)		(%)	(%)
	5M37458D	58.8		0.000209797	5.10985	0.0364783	2.72591	0.00010354	12.409	0.000587601	3.22015	0.080855	0.384657	37.7984	11.7742	622.086	163.96	26.1734	12.4415	0.00659975	0.000573442
	5M37460D	59.3		0.00172561	1.06124	0.267598	2.51579	0.000684294	2.40672	0.0025454	1.01222	0.520939	0.0984307	11.6719	4.74042	215.867	82.6407	5.24744	52.0439	0.00376337	0.000207471
	5M37461D	59.8		0.000560667	1.90993	0.0687424	2.67825	0.000194747	8.36507	0.000759836	2.43377	0.178294	0.195491	23.2459	9.19317	407.154	144.178	9.22555	15.7239	0.00442615	0.000331815
	5M37462D	60.5		0.000272501	6.18391	0.0300705	2.92657	9.86887e-05	12.3165	0.000415108	4.61541	0.0953304	0.287139	41.8082	26.019	677.08	351.472	17.2027	8.71657	0.00560912	0.000639098
	5M37463D	61		7.46046e-05	13.8166	0.00674045	5.95234	5.08036e-05	29.9565	0.000145826	13.7348	0.0230283	1.17839	9.241	43.9965	172.984	785.408	5.64626	3.12667	0.00897602	0.00277014
	5M37465D	62		0.000118095	11.4306	0.00988149	5.76905	1.94473e-05	63.6624	0.000182925	9.87734	0.0412394	0.642042	38.6372	46.7379	633.729	646.668	16.4346	3.89803	0.00763331	0.00180275
	5M37466D	64		3.77746e-05	31.7645	0.00370551	14.7718	8.94552e-06	182.96	0.000185048	10.2387	0.0267368	1.09138	86.469	43.3562	1197.68	439.147	58.9352	4.04951	0.0211468	0.00764045
			S	0.00299905	1.19358	0.423217	1.69173	0.00116047	3.33989	0.00482174	1.10085	0.966423	0.0916763
	Information on Analysis and Constants Used in Calculations									Results		40(a)/36(a)	± 2s	40(r)/39(k)	± 2s	Age	± 2s	MSWD	39Ar(k)	K/Ca	± 2s
																(Ma)			(%,n)
	Sample = SRLR06-2				Age Equations = Min et al. (2000)					Age Plateau Cannot Calculate
	Material = poly				Negative Intensities = Allowed
	Location = Laser				Decay Constant 40K = 5.531 ± 0.013 E-10 1/a
	Analyst = Fred Jourdan				Decay Constant 39Ar = 2.940 ± 0.029 E-07 1/h
	Project = POLYHALITE PAKISTAN_L RICHARDS15				Decay Constant 37Ar = 8.230 ± 0.082 E-04 1/h
	Mass Discrimination Law = POW				Decay Constant 36Cl = 2.303 ± 0.046 E-06 1/a					Total Fusion Age				23.3732	4.8115	409.149	75.3965		7	0.00457222	0.000188985
	Irradiation = I19t40h				Decay Constant 40K(EC,β⁺) = 0.576 ± 0.002 E-10 1/a										0.205855		0.184276
	J = 0.01086400 ± 0.00002600				Decay Constant 40K(β⁻) = 4.955 ± 0.013 E-10 1/a					Full External Error							75.4504
	FCs = 28.294 ± 0.037 Ma				Atmospheric Ratio 40/36(a) = 298.56 ± 0.30					Analytical Error							75.3761
	IGSN = Undefined				Atmospheric Ratio 38/36(a) = 0.1869 ± 0.0002
	Preferred Age = Undefined				Production Ratio 39/37(ca) = 0.000760 ± 0.000009					Normal Isochron Cannot Calculate
	Classification = Undefined				Production Ratio 38/37(ca) = 0.000023 ± 0.000002
	Experiment Type = Undefined				Production Ratio 36/37(ca) = 0.000270 ± 0.000002
	Extraction Method = Undefined				Production Ratio 40/39(k) = 0.000730 ± 0.000091
	Heating = 60 sec				Production Ratio 38/39(k) = 0.012400 ± 0.003968
	Isolation = 3.00 min				Production Ratio 36/38(cl) = 263.00 ± 13.15
	Instrument = MAP215-50				Scaling Ratio K/Ca = 0.430
	Lithology = Undefined				Abundance Ratio 40K/K = 1.1700 ± 0.0100 E-04					Inverse Isochron Cannot Calculate
	Lat-Lon = Undefined - Undefined				Atomic Weight K = 39.0983 ± 0.0001 g
	Feature = Undefined

## Sheet: SRLR06-3.1
	Relative Abundances			36Ar [V]	%1s	37Ar [V]	%1s	38Ar [V]	%1s	39Ar [V]	%1s	40Ar [V]	%1s	40(r)/39(k)	± 2s	Age	± 2s	40Ar(r)	39Ar(k)	K/Ca	± 2s
																(Ma)		(%)	(%)
	5M36695D	58.8		4.94085e-06	128.957	0.0211499	2.9074	0.000465569	3.04525	0.0397182	0.200346	1.08869	0.0683558	27.4265	0.150607	469.913	2.27238	100.018	10.4109	0.807184	0.0470475
	5M36712D	59.3		3.64024e-06	344.003	0.0129988	3.23305	0.000304829	4.6247	0.0246061	0.523425	0.681211	0.233865	27.6934	0.439688	473.937	6.61933	99.9916	6.44976	0.81364	0.0532963
	5M36713D	59.8		9.77349e-06	137.986	0.0364574	2.04423	0.000855736	2.69556	0.0711297	0.22358	2.00445	0.083093	28.1907	0.175864	481.408	2.63665	99.9985	18.6448	0.838619	0.0344913
	5M36714D	60.5		2.90341e-05	44.9622	0.0665198	1.80807	0.00154919	1.91274	0.127213	0.236395	3.62623	0.0628429	28.4897	0.152325	485.885	2.27809	99.9063	33.3453	0.822009	0.0299782
	5M36715D	61		2.7013e-06	467.624	0.00624501	3.43802	0.000132287	11.0566	0.011477	0.625359	0.335275	0.164947	29.1977	0.758322	496.442	11.275	99.9071	3.00832	0.789922	0.0552072
	5M36717D	62		5.10351e-06	253.15	0.0395517	1.96859	0.000905709	3.39245	0.0744854	0.237882	2.26082	0.0336321	30.3865	0.17909	514.032	2.637	100.071	19.5241	0.809466	0.0321022
	5M36718D	64		1.48017e-06	871.302	0.00953152	2.77645	0.000217709	6.39667	0.0181056	0.517283	0.555859	0.151717	30.7305	0.539353	519.09	7.91949	100.056	4.74587	0.816482	0.0461191
	5M36719D	67		4.36849e-06	167.589	0.00688235	3.16028	0.000176143	5.57422	0.0140384	0.315706	0.429546	0.131251	30.5552	0.375175	516.515	5.51667	99.8232	3.67985	0.876772	0.0556929
	5M36720D	70		-7.08712e-06	89.1385	0.000426767	37.3237	2.5762e-05	23.8029	0.000729042	2.91329	0.0223307	0.538198	33.5952	5.54451	560.672	79.561	109.631	0.191088	0.734238	0.549759
			S	5.3955e-05	62.4683	0.199763	0.916475	0.00463294	1.23916	0.381503	0.113163	11.0044	0.0327475
	Information on Analysis and Constants Used in Calculations									Results		40(a)/36(a)	± 2s	40(r)/39(k)	± 2s	Age	± 2s	MSWD	39Ar(k)	K/Ca	± 2s
																(Ma)			(%,n)
	Sample = SRLR06-3				Age Equations = Min et al. (2000)					Age Plateau Cannot Calculate
	Material = polyh				Negative Intensities = Allowed
	Location = Laser				Decay Constant 40K = 5.531 ± 0.013 E-10 1/a
	Analyst = Fred Jourdan				Decay Constant 39Ar = 2.940 ± 0.029 E-07 1/h
	Project = POLYHALITE PAKISTAN_L RICHARDS15				Decay Constant 37Ar = 8.230 ± 0.082 E-04 1/h
	Mass Discrimination Law = POW				Decay Constant 36Cl = 2.303 ± 0.046 E-06 1/a					Total Fusion Age				28.8556	0.0860908	491.35	1.82037		9	0.820875	0.0151606
	Irradiation = I19t40h				Decay Constant 40K(EC,β⁺) = 0.576 ± 0.002 E-10 1/a										0.0029835		0.00370484
	J = 0.01082100 ± 0.00001623				Decay Constant 40K(β⁻) = 4.955 ± 0.013 E-10 1/a					Full External Error							3.80395
	GA1550 = 99.738 ± 0.100 Ma				Atmospheric Ratio 40/36(a) = 298.56 ± 0.30					Analytical Error							1.28364
	IGSN = Undefined				Atmospheric Ratio 38/36(a) = 0.1869 ± 0.0002
	Preferred Age = Undefined				Production Ratio 39/37(ca) = 0.000760 ± 0.000009					Normal Isochron Cannot Calculate
	Classification = Undefined				Production Ratio 38/37(ca) = 0.000023 ± 0.000002
	Experiment Type = Undefined				Production Ratio 36/37(ca) = 0.000270 ± 0.000002
	Extraction Method = Undefined				Production Ratio 40/39(k) = 0.000730 ± 0.000091
	Heating = 60 sec				Production Ratio 38/39(k) = 0.012400 ± 0.003968
	Isolation = 3.00 min				Production Ratio 36/38(cl) = 263.00 ± 13.15
	Instrument = MAP-215-50				Scaling Ratio K/Ca = 0.430
	Lithology = Undefined				Abundance Ratio 40K/K = 1.1700 ± 0.0100 E-04					Inverse Isochron Cannot Calculate
	Lat-Lon = Undefined - Undefined				Atomic Weight K = 39.0983 ± 0.0001 g
	Feature = Undefined

## Sheet: SRLR06-3.2
	Relative Abundances			36Ar [V]	%1s	37Ar [V]	%1s	38Ar [V]	%1s	39Ar [V]	%1s	40Ar [V]	%1s	40(r)/39(k)	± 2s	Age	± 2s	40Ar(r)	39Ar(k)	K/Ca	± 2s
																(Ma)		(%)	(%)
	5M37470D	58.8		-1.51234e-05	47.8925	0.0045232	11.377	8.58622e-05	11.9858	0.00693321	0.65302	0.131885	0.22351	19.7351	0.680734	351.238	11.0113	103.696	0.528637	0.658781	0.150146
	5M37472D	59.3		0.000393495	2.62416	0.064301	2.75791	0.000996641	2.10214	0.0749301	0.0937645	1.2324	0.0674562	14.9576	0.0899217	272.259	1.51949	90.8834	5.71231	0.500753	0.0276366
	5M37473D~	59.8		0.000157619	6.01806	0.112196	2.64479	0.00249835	1.40739	0.199863	0.0894505	3.79066	0.0979709	18.7833	0.0576439	335.776	0.940437	98.9933	15.2401	0.765665	0.0405237
	5M37474D	60.5		0.000123164	9.90036	0.201449	2.51569	0.00451633	1.05222	0.372328	0.110907	7.13372	0.148086	19.1118	0.0735498	341.126	1.19639	99.7084	28.3913	0.794422	0.0400092
	5M37475D	61		1.65534e-05	58.9832	0.0439106	3.04402	0.00095006	2.31306	0.0802882	0.141582	1.60667	0.063471	20.0014	0.0956111	355.54	1.5429	99.9091	6.12223	0.785905	0.047898
	5M37477D	62		4.98076e-05	16.8117	0.109678	2.59268	0.00249499	1.5683	0.208927	0.110921	4.75992	0.0323601	22.7622	0.0578634	399.551	0.911303	99.8701	15.9316	0.81879	0.042496
	5M37478D	64		5.44145e-06	250.655	0.0783113	2.7519	0.00177595	0.984503	0.148147	0.148976	3.22093	0.07931	21.7811	0.0918486	384.034	1.45901	100.142	11.2968	0.813132	0.0448188
	5M37479D	67		2.96902e-05	40.4636	0.105727	2.84349	0.00244986	1.24441	0.204902	0.161633	4.9776	0.118733	24.2997	0.103628	423.606	1.61049	99.9901	15.6248	0.833029	0.0474508
	5M37480D	70		-1.49046e-05	50.8244	0.00853038	6.48849	0.000183671	4.89269	0.0151094	0.380463	0.333364	0.0907802	22.4122	0.347061	394.032	5.48264	101.538	1.15213	0.761309	0.0989647
			S	0.000745743	4.13511	0.728626	1.07856	0.0159517	0.538155	1.31143	0.0504533	27.1871	0.0481167
	Information on Analysis and Constants Used in Calculations									Results		40(a)/36(a)	± 2s	40(r)/39(k)	± 2s	Age	± 2s	MSWD	39Ar(k)	K/Ca	± 2s
																(Ma)			(%,n)
	Sample = SRLR06-3				Age Equations = Min et al. (2000)					Age Plateau Cannot Calculate
	Material = poly				Negative Intensities = Allowed
	Location = Laser				Decay Constant 40K = 5.531 ± 0.013 E-10 1/a
	Analyst = Fred Jourdan				Decay Constant 39Ar = 2.940 ± 0.029 E-07 1/h
	Project = POLYHALITE PAKISTAN_L RICHARDS15				Decay Constant 37Ar = 8.230 ± 0.082 E-04 1/h
	Mass Discrimination Law = POW				Decay Constant 36Cl = 2.303 ± 0.046 E-06 1/a					Total Fusion Age				20.6139	0.0320903	365.398	1.66521		9	0.773616	0.0167061
	Irradiation = I19t40h				Decay Constant 40K(EC,β⁺) = 0.576 ± 0.002 E-10 1/a										0.00155673		0.00455727
	J = 0.01086400 ± 0.00002600				Decay Constant 40K(β⁻) = 4.955 ± 0.013 E-10 1/a					Full External Error							3.02466
	GA1550 = 98.738 ± 0.099 Ma				Atmospheric Ratio 40/36(a) = 298.56 ± 0.30					Analytical Error							0.515033
	IGSN = Undefined				Atmospheric Ratio 38/36(a) = 0.1869 ± 0.0002
	Preferred Age = Undefined				Production Ratio 39/37(ca) = 0.000760 ± 0.000009					Normal Isochron Cannot Calculate
	Classification = Undefined				Production Ratio 38/37(ca) = 0.000023 ± 0.000002
	Experiment Type = Undefined				Production Ratio 36/37(ca) = 0.000270 ± 0.000002
	Extraction Method = Undefined				Production Ratio 40/39(k) = 0.000730 ± 0.000091
	Heating = 60 sec				Production Ratio 38/39(k) = 0.012400 ± 0.003968
	Isolation = 3.00 min				Production Ratio 36/38(cl) = 263.00 ± 13.15
	Instrument = MAP215-50				Scaling Ratio K/Ca = 0.430
	Lithology = Undefined				Abundance Ratio 40K/K = 1.1700 ± 0.0100 E-04					Inverse Isochron Cannot Calculate
	Lat-Lon = Undefined - Undefined				Atomic Weight K = 39.0983 ± 0.0001 g
	Feature = Undefined

## Sheet: SRLR06-4.2
	Relative Abundances			36Ar [V]	%1s	37Ar [V]	%1s	38Ar [V]	%1s	39Ar [V]	%1s	40Ar [V]	%1s	40(r)/39(k)	± 2s	Age	± 2s	40Ar(r)	39Ar(k)	K/Ca	± 2s
																(Ma)		(%)	(%)
	5M37485D	59.3		0.000851182	1.47421	0.268897	2.51776	0.000976839	1.52948	0.0102203	0.609034	0.264403	0.201354	3.19443	0.766538	61.6863	14.5527	12.1009	49.2168	0.0160167	0.000830932
	5M37486D	59.8		0.000576956	3.9927	0.119759	2.72345	0.000489405	4.31562	0.00458692	0.784669	0.220098	0.233214	12.7932	3.07814	235.309	53.088	26.1324	22.0922	0.0161427	0.000916686
	5M37487D	60.5		0.000207995	3.78142	0.0339787	3.0358	0.000110517	9.87181	0.00173089	1.44029	0.109105	0.454454	29.1764	2.94427	497.85	43.9163	45.5962	8.37844	0.0215776	0.00145429
	5M37488D	61		4.64149e-05	22.5937	0.00878798	4.86394	3.12656e-05	30.8393	0.00053881	3.5039	0.0296401	1.5695	30.9917	12.0992	524.726	177.807	55.6398	2.61481	0.0260374	0.00313529
	5M37490D	62		5.62136e-05	14.267	0.00892849	4.59024	2.67205e-05	38.8653	0.000536023	3.55656	0.0292313	1.55773	24.8815	9.38475	432.625	145.123	45.0484	2.60059	0.0254883	0.00297459
	5M37491D	64		0.000108951	8.92142	0.0255021	3.1518	8.11071e-05	14.6025	0.0019385	1.05755	0.093123	0.522901	32.6462	3.1459	548.877	45.6181	67.2786	9.43024	0.032359	0.00215386
	5M37492D	67		4.97864e-05	24.4796	0.00616774	7.04261	3.46977e-05	30.2667	0.00115795	2.26665	0.0576258	0.838594	37.5099	6.59105	618.064	91.9875	75.0684	5.66695	0.0804028	0.0119016
			S	0.0018975	1.80056	0.472021	1.62346	0.00175055	2.01135	0.0207094	0.421524	0.803226	0.161711
	Information on Analysis and Constants Used in Calculations									Results		40(a)/36(a)	± 2s	40(r)/39(k)	± 2s	Age	± 2s	MSWD	39Ar(k)	K/Ca	± 2s
																(Ma)			(%,n)
	Sample = SRLR06-4				Age Equations = Min et al. (2000)					Age Plateau Cannot Calculate
	Material = poly				Negative Intensities = Allowed
	Location = Laser				Decay Constant 40K = 5.531 ± 0.013 E-10 1/a
	Analyst = Fred Jourdan				Decay Constant 39Ar = 2.940 ± 0.029 E-07 1/h
	Project = POLYHALITE PAKISTAN_L RICHARDS15				Decay Constant 37Ar = 8.230 ± 0.082 E-04 1/h
	Mass Discrimination Law = POW				Decay Constant 36Cl = 2.303 ± 0.046 E-06 1/a					Total Fusion Age				13.5047	1.01959	247.54	17.5011		7	0.018539	0.000622714
	Irradiation = I19t40h				Decay Constant 40K(EC,β⁺) = 0.576 ± 0.002 E-10 1/a										0.0754985		0.0707002
	J = 0.01086400 ± 0.00002600				Decay Constant 40K(β⁻) = 4.955 ± 0.013 E-10 1/a					Full External Error							17.5873
	GA1550 = 99.738 ± 0.100 Ma				Atmospheric Ratio 40/36(a) = 298.56 ± 0.30					Analytical Error							17.466
	IGSN = Undefined				Atmospheric Ratio 38/36(a) = 0.1869 ± 0.0002
	Preferred Age = Undefined				Production Ratio 39/37(ca) = 0.000760 ± 0.000009					Normal Isochron Cannot Calculate
	Classification = Undefined				Production Ratio 38/37(ca) = 0.000023 ± 0.000002
	Experiment Type = Undefined				Production Ratio 36/37(ca) = 0.000270 ± 0.000002
	Extraction Method = Undefined				Production Ratio 40/39(k) = 0.000730 ± 0.000091
	Heating = 60 sec				Production Ratio 38/39(k) = 0.012400 ± 0.003968
	Isolation = 3.00 min				Production Ratio 36/38(cl) = 263.00 ± 13.15
	Instrument = MAP215-50				Scaling Ratio K/Ca = 0.430
	Lithology = Undefined				Abundance Ratio 40K/K = 1.1700 ± 0.0100 E-04					Inverse Isochron Cannot Calculate
	Lat-Lon = Undefined - Undefined				Atomic Weight K = 39.0983 ± 0.0001 g
	Feature = Undefined

## Sheet: SRLR06-4.2-
	Relative Abundances			36Ar [V]	%1s	37Ar [V]	%1s	38Ar [V]	%1s	39Ar [V]	%1s	40Ar [V]	%1s	40(r)/39(k)	± 2s	Age	± 2s	40Ar(r)	39Ar(k)	K/Ca	± 2s
																(Ma)		(%)	(%)
	5M36780D	58.5		9.08464e-05	14.6419	0.00268103	8.31152	2.81089e-05	35.1266	0.000130824	13.8756	0.0259026	1.33954	-7.79623	61.9494	-160.024	1329.53	-3.87624	0.56032	0.0206555	0.00676001
	5M36781D	58.8		0.00114289	2.06107	0.175408	1.85335	0.000754234	2.67906	0.00845976	0.81624	0.332538	0.161307	0.657103	1.69739	12.8621	33.1069	1.64533	36.2266	0.0204117	0.000829018
	5M36783D	59.3		0.00105202	2.24283	0.194451	1.7424	0.00147699	1.89504	0.00892067	0.756597	0.328293	0.157709	3.41169	1.61402	65.8063	30.5723	9.11697	38.1689	0.0193999	0.000739146
	5M36784D	59.8		0.000181832	7.43754	0.0410876	2.12847	0.000135138	7.09717	0.00209388	1.23758	0.0660274	0.51115	7.29848	3.93394	137.97	71.6002	22.8	8.97414	0.0215866	0.00106718
	5M36785D	60.5		0.000186015	7.74746	0.0415589	2.11198	0.000141158	5.86871	0.00209333	1.66391	0.074666	0.622564	10.9044	4.21517	202.437	74.0318	30.1103	8.97021	0.0213324	0.001154
	5M36787D	62		7.93552e-05	19.199	0.0163423	2.91091	5.41544e-05	13.4487	0.00105717	2.06049	0.040006	0.866196	16.8765	8.7617	304.396	145.446	44.0726	4.54546	0.0274895	0.00196867
	5M36788D	64		2.2228e-05	60.4559	0.00203545	11.4634	1.69707e-05	48.4862	0.000364716	6.33438	0.0191057	1.8484	34.787	22.6179	579.657	322.442	66.1245	1.58007	0.0767214	0.0201168
	5M36789D	67		8.54936e-05	18.6575	-0.000278596	78.6183	1.49847e-05	43.6185	0.000223734	12.4836	0.0280049	2.09561	10.9728	42.941	203.638	753.679	8.77459	0.974338	-0.345649	0.550283
			S	0.00284068	1.70516	0.473286	1.03427	0.00262174	1.53203	0.0233441	0.494509	0.914543	0.138111
	Information on Analysis and Constants Used in Calculations									Results		40(a)/36(a)	± 2s	40(r)/39(k)	± 2s	Age	± 2s	MSWD	39Ar(k)	K/Ca	± 2s
																(Ma)			(%,n)
	Sample = SRLR06-4				Age Equations = Min et al. (2000)					Age Plateau Cannot Calculate
	Material = polyh				Negative Intensities = Allowed
	Location = Laser				Decay Constant 40K = 5.531 ± 0.013 E-10 1/a
	Analyst = Fred Jourdan				Decay Constant 39Ar = 2.940 ± 0.029 E-07 1/h
	Project = POLYHALITE PAKISTAN_L RICHARDS15				Decay Constant 37Ar = 8.230 ± 0.082 E-04 1/h
	Mass Discrimination Law = POW				Decay Constant 36Cl = 2.303 ± 0.046 E-06 1/a					Total Fusion Age				4.55338	1.26516	87.3036	23.6847		8	0.0208823	0.000480263
	Irradiation = I19t40h				Decay Constant 40K(EC,β⁺) = 0.576 ± 0.002 E-10 1/a										0.277852		0.271291
	J = 0.01086400 ± 0.00002600				Decay Constant 40K(β⁻) = 4.955 ± 0.013 E-10 1/a					Full External Error							23.693
	GA1550 = 99.738 ± 0.100 Ma				Atmospheric Ratio 40/36(a) = 298.56 ± 0.30					Analytical Error							23.6812
	IGSN = Undefined				Atmospheric Ratio 38/36(a) = 0.1869 ± 0.0002
	Preferred Age = Undefined				Production Ratio 39/37(ca) = 0.000760 ± 0.000009					Normal Isochron Cannot Calculate
	Classification = Undefined				Production Ratio 38/37(ca) = 0.000023 ± 0.000002
	Experiment Type = Undefined				Production Ratio 36/37(ca) = 0.000270 ± 0.000002
	Extraction Method = Undefined				Production Ratio 40/39(k) = 0.000730 ± 0.000091
	Heating = 60 sec				Production Ratio 38/39(k) = 0.012400 ± 0.003968
	Isolation = 3.00 min				Production Ratio 36/38(cl) = 263.00 ± 13.15
	Instrument = MAP-215-50				Scaling Ratio K/Ca = 0.430
	Lithology = Undefined				Abundance Ratio 40K/K = 1.1700 ± 0.0100 E-04					Inverse Isochron Cannot Calculate
	Lat-Lon = Undefined - Undefined				Atomic Weight K = 39.0983 ± 0.0001 g
	Feature = Undefined
