# Supplementary material for: Deformation recorded in polyhalite from evaporite detachments revealed by 40 Ar ∕ 39 Ar dating
Source: Copernicus journal article supplement (doi:10.5194/gchron-3-545-2021), 2021-12-13
Supplement: Supplementary file 1 [file gchron-3-545-2021-supplement.zip]

Archive with 2 entries (2 files):
- gchron-3-545-2021-supplement-title-page.pdf
- Ar-Ar polyhalite Suplementary Datasheet.xlsx
