# Supplementary material for: Deformation recorded in polyhalite from evaporite detachments revealed by 40 Ar ∕ 39 Ar dating
Source: Copernicus journal article supplement (doi:10.5194/gchron-3-545-2021), 2021-12-13
Supplement: Supplementary file 1 [file gchron-3-545-2021-supplement.zip › gchron-3-545-2021-supplement-title-page.pdf]

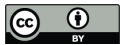

*Supplement of*

## **Deformation recorded in polyhalite from evaporite detachments revealed by $^{40}\text{Ar} / ^{39}\text{Ar}$ dating**

**Lachlan Richards et al.**

*Correspondence to:* Lachlan Richards ([lachlan.richards.08@aberdeen.ac.uk](mailto:lachlan.richards.08@aberdeen.ac.uk))

- [gchron-3-545-2021-supplement-title-page.pdf](#)
- [Ar-Ar polyhalite Supplementary Datasheet.xlsx](#)

The copyright of individual parts of the supplement might differ from the article licence.
